# Supplementary material for: Zero-valent iron nanoparticles with sustained high reductive activity for carbon tetrachloride dechlorination
Source: Royal Society of Chemistry journal article supplement (doi:10.1039/c5ra07052j), 2015-01-01
Supplement: c5ra07052j1.pdf [file c5ra07052j1.pdf]

Supporting Information for

**Zero-Valent Iron Nanoparticle with Sustained High Reductive Activity for  
Carbon Tetrachloride Dechlorination**

Ying-Chao Huo <sup>a,b</sup>, Wen-Wei Li <sup>b,\*</sup>, Di Min <sup>b</sup>, Dan-Dan Wang <sup>a</sup>, Hou-Qi Liu <sup>a</sup>, Qin  
Kong <sup>a</sup>, Tai-Chu Lau <sup>a,c</sup>, Raymond J. Zeng <sup>a,b,\*\*</sup>

<sup>a</sup> Advanced Laboratory for Environmental Research & Technology (ALERT), USTC-  
CityU, Suzhou 215123, China

<sup>b</sup> CAS for Urban Pollutant Conversion, Department of Chemistry, University of  
Science and Technology of China, Hefei 230026, China

<sup>c</sup> Department of Biology and Chemistry, City University of Hong Kong, Tat Chee  
Avenue, Kowloon, Hong Kong SAR, Hong Kong

Corresponding Authors:

\*Corresponding author. Tel.: (+86)51287161361; Fax: (+86)51287161381. E-mail  
address: [wwli@ustc.edu.cn](mailto:wwli@ustc.edu.cn) (Wen-Wei Li)

\*\* Corresponding author. Tel.: (+86)55163600203; Fax: (+86)55163601592. E-mail  
address: [rzeng@ustc.edu.cn](mailto:rzeng@ustc.edu.cn) (Raymond J. Zeng).

## 1 1 Supplementary materials and methods

### 2 1.1 Chemicals.

3 Chemicals used in the experiment were carbon tetrachloride (CT) (99.5%, Sigma),  
4 chloroform (CF) (99.9%, Sigma), dichloromethane (DCM) (99 %, Sigma),  
5 perchloroethylene (PCE) (Aladdin) and  $\text{FeCl}_2 \cdot 4\text{H}_2\text{O}$  (99%, DAMAO).  
6  $\text{FeSO}_4 \cdot 7\text{H}_2\text{O}$  (99%), NaOH (96%), HCl (36%~38%) and  $\text{NaBH}_4$  (98%) were  
7 purchased from Sinopharm Chemical Reagent Co. Ltd., China. Methane standard gas  
8 was used for the analysis of non-chlorinated transformation product. Methanol (99.9%,  
9 Fisher) for preparation of CT stock solution was HPLC grade. All experiments were  
10 prepared by deaerated deionized water (DDW) which was prepared using Minipore  
11 ultrapure water ( $18\text{M}\Omega\cdot\text{cm}$ ) and purged with  $\text{N}_2$  for 30 min.

12

### 13 1.2 Synthesis of nZVI.

14 nZVI was synthesized following previous method <sup>1</sup> with slight modification: 100 mL  
15 DDW was adjusted to pH=2 with  $\text{H}_2\text{SO}_4$  (acidic-DDW) and then 0.3 mol/L of  
16  $\text{FeSO}_4 \cdot 7\text{H}_2\text{O}$  (solution A) was prepared using the acidic-DDW. Another 100 mL  
17 DDW was used to prepare 0.6 mol/L of  $\text{NaBH}_4$  solution (solution B). In a typical  
18 synthesis process, solution B was dropped into solution A with a rate of 20 mL/min at  
19  $\text{N}_2$  atmosphere. During the addition of solution B, the solution was fully mixed with  
20 magnetic stirring. The black precipitates appeared and scattered equably in the  
21 solution. After the addition, the Fe precipitates were settled for 30 min followed by

22 filtration with sand core funnel (G3) and then washed with DDW for three times and  
23 ethanol for twice. Then the filtrated nZVI was vacuum-dried for 12 hours, grinded and  
24 saved for use.

25

### 26 **1.3 Characterization of Materials.**

27 For SEM-EDS, XRD and XPS analysis, Fe suspension was collected from the serum  
28 bottle after several cycles of reductive dechlorination and immediately washed with  
29 DDW for 3 times and ethanol for 2 times in the anaerobic chamber. Then, the  
30 suspension was filtrated and the retenate was dried for 12 h using vacuum drier.

31

32 The changes in particle morphology of nZVI and Fe precipitates were identified by  
33 scanning electron microscopy (SEM) and energy dispersive spectroscopy (EDS)  
34 which were performed on a Quanta FEG250 scanning electron microscope.

35

36 Oxidation of Fe surface and formation of Fe oxides/hydroxides were identified on a  
37 Bruker D8 Advance X-ray diffractometer with Cu Ka radiation ( $\lambda = 1.54178 \text{ \AA}$ ). Fe(0)  
38 particles were collected in an anaerobic chamber after each reaction cycle and dried  
39 for 12 h. The samples were scanned between  $10^\circ$  to  $70^\circ 2\theta$ . XRD patterns of samples  
40 were analyzed by comparing to those in the Joint Committee on Powder Diffraction  
41 Standards (JCPDS) diffraction data files (JADE 6).

42

43 X-ray photoelectron spectroscopy (XPS) analysis was recorded with a Thermo  
44 ESCALAB 250 X-ray photoelectron spectroscope equipped with a standard and  
45 monochromatic Al  $K\alpha$  X-ray (1486.6 eV) source operated at 150 W. The binding  
46 energies obtained in the XPS analysis were corrected for specimen charging with C 1s  
47 peak at 284.8 eV as a reference. Shirley baseline and a Gaussian-Lorentzian peak  
48 shape were used to fit the data.

49

#### 50 **1.4 Analytical Methods.**

51 The samples of CT and chlorinated products (CF and DCM) in headspace were  
52 measured by an Agilent 6890 gas chromatograph (GC) equipped with an electron  
53 capture detector, a HP-5 column was used to separate the organic compounds and  
54 with ultra-high purity nitrogen (>99.9995%) as the carrier gas. The oven temperature  
55 was programmed as follows: 5 min at 50 °C, ramping to 65 °C at a rate of 5 °C/min,  
56 and 1 min at 65 °C and temperatures of the injector and detector were maintained at  
57 200 and 250 °C. Methane was measured by a FuLi 9790 GC equipped with a thermal  
58 conductivity detector and a Molecular Sieve 5A packed column. The temperature of  
59 the injector and detector was set at 50 and 80 °C, respectively and oven temperature  
60 was isothermally maintained at 40 °C. For a typical measurement, the test bottles  
61 were taken out of the orbital shaker at each sampling time and samples were collected  
62 by withdrawing 50  $\mu$ L of gas in headspace using a gastight syringe (100  $\mu$ L, SGE).  
63 The headspace sample was immediately injected into the injection port for analysis.

64

65 The production of ferrous ion in serum bottles during the reductive dechlorination of  
66 CT were investigated by measuring the concentration of aqueous Fe(II) by the 1,10-  
67 Phenanthroline spectrophotometry method at the wavelength of 510 nm using a UV-  
68 vis spectrometer (Shimadzu UV-1800) . In a typical process, the supernatant was  
69 filtered by 0.45  $\mu\text{m}$  PTFE membrane filter to remove particles and was immediately  
70 acidified with 3 M HCl and mixed vigorously. Then colorimetric tubes (10 mL) were  
71 added with 1mL acetate-ammonium acetate buffer (40 g ammonium acetate and 50  
72 mL acetate and then diluted to 100mL with DDW), 1mL diluted aqueous sample and  
73 200  $\mu\text{L}$  0.5% 1,10-phenanthroline (m/V) and then were diluted to scale with DDW.  
74 The absorbance of Fe-Phenanthroline complex was measured after 15 min coloration  
75 reaction.

## 2 Supplementary Results and Discussion

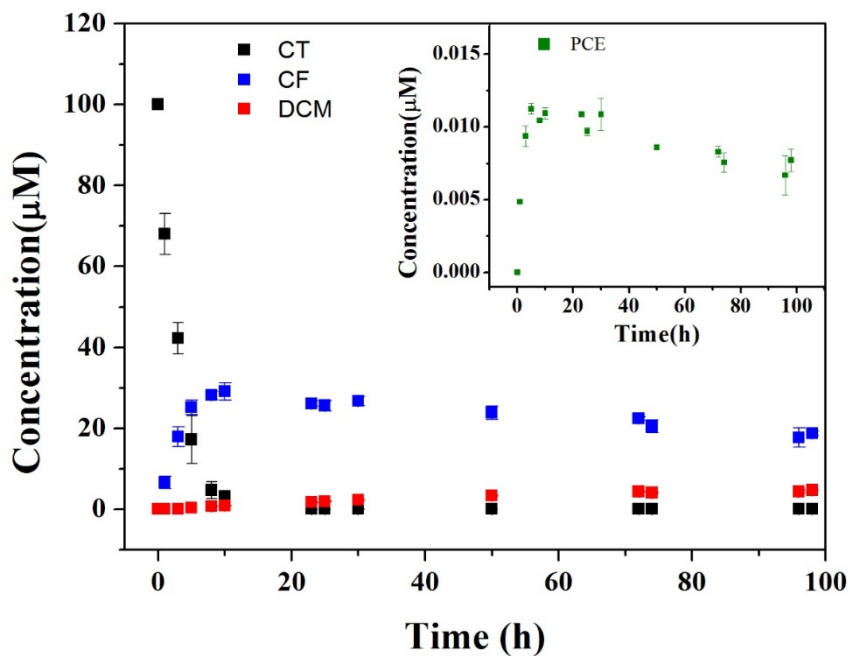

**Fig. S1.** Concentrations of CT and its chlorinated products vs. time. The initial CT concentration was 100  $\mu\text{M}$ . Error bars are the ranges of duplicate samples. Inserted showing the formation of PCE. CT depleted completely and CF began to be degraded accompanied with the increased concentration of DCM. The concentration of PCE changed with the same trend as CF.

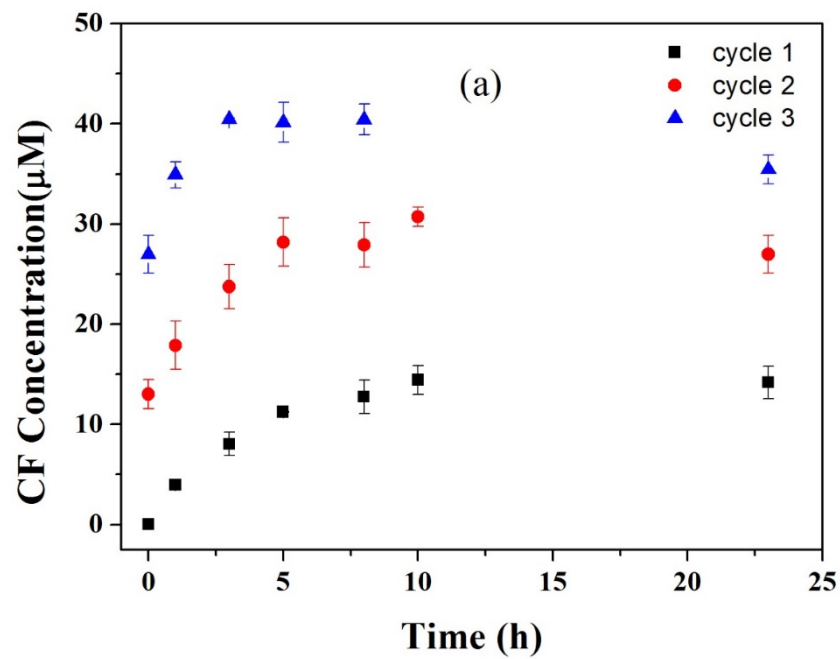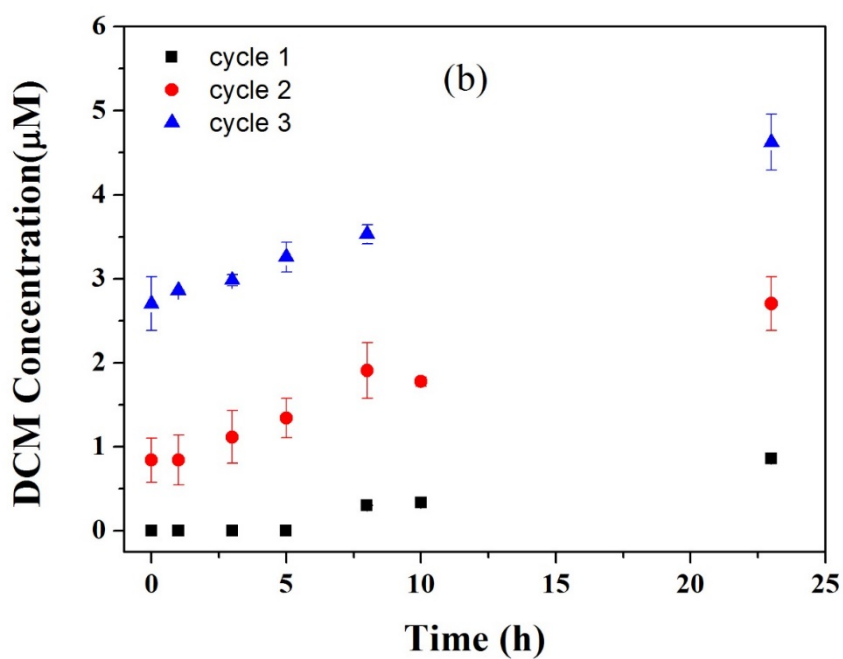

**Fig. S2.** Concentrations of dechlorinated products (a) CF and (b) DCM versus time in Cycles 1-3. Error bars are the ranges of duplicate samples

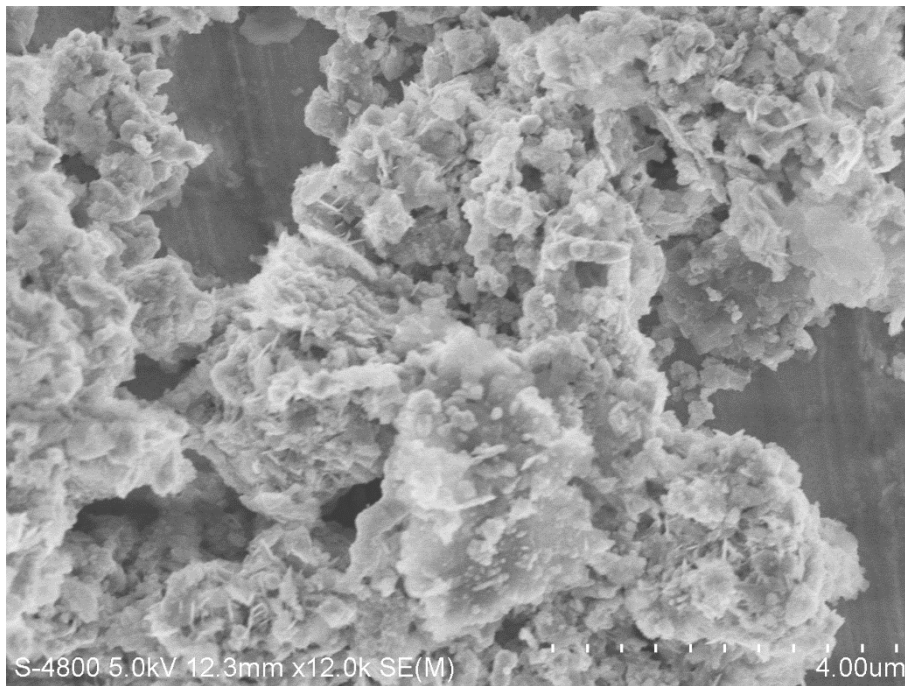

**Fig. S3.** SEM image of Aged-nZVI at the end of the experiment.

Compared to the SEM image after Cycle 3, the laminated-Fe decreased while the bulk-structured Fe minerals increased, which indicates that the species of Fe oxides or oxyhydroxides changed during the consecutive cycles of dechlorination. The morphologies of the Fe materials were similar to the magnetite and hematite formed during nitrate reduction by Fe(0) nanoparticles <sup>2</sup>.



(a)

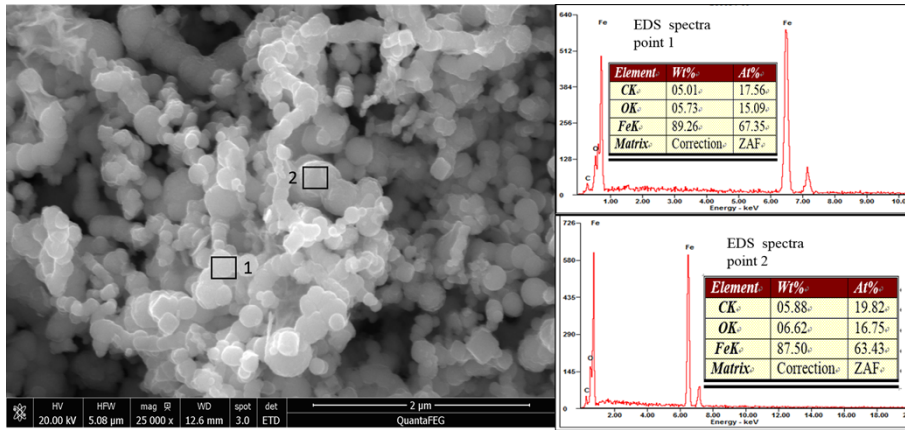

(b)

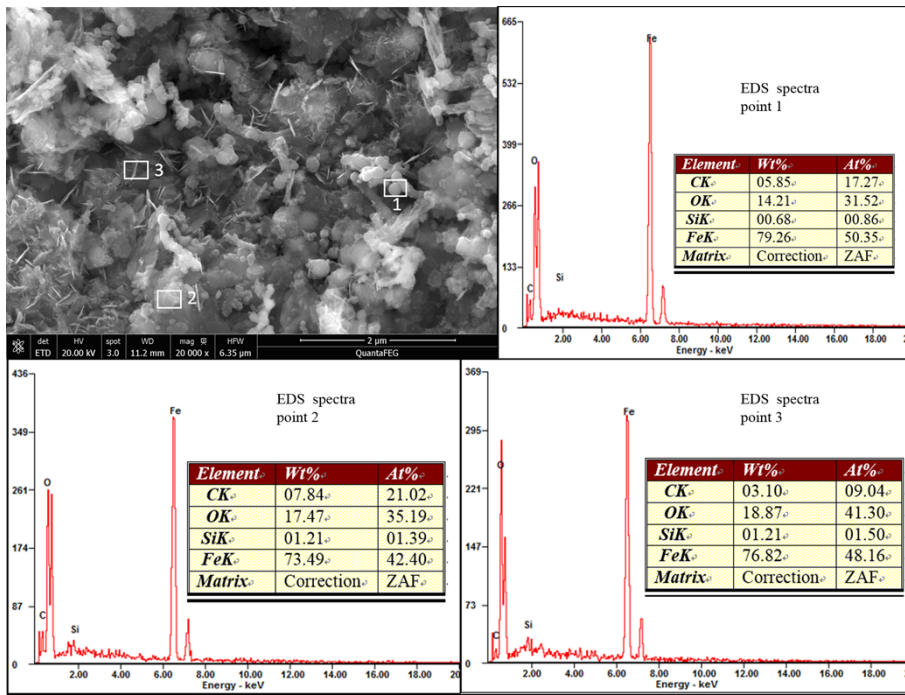

(c)

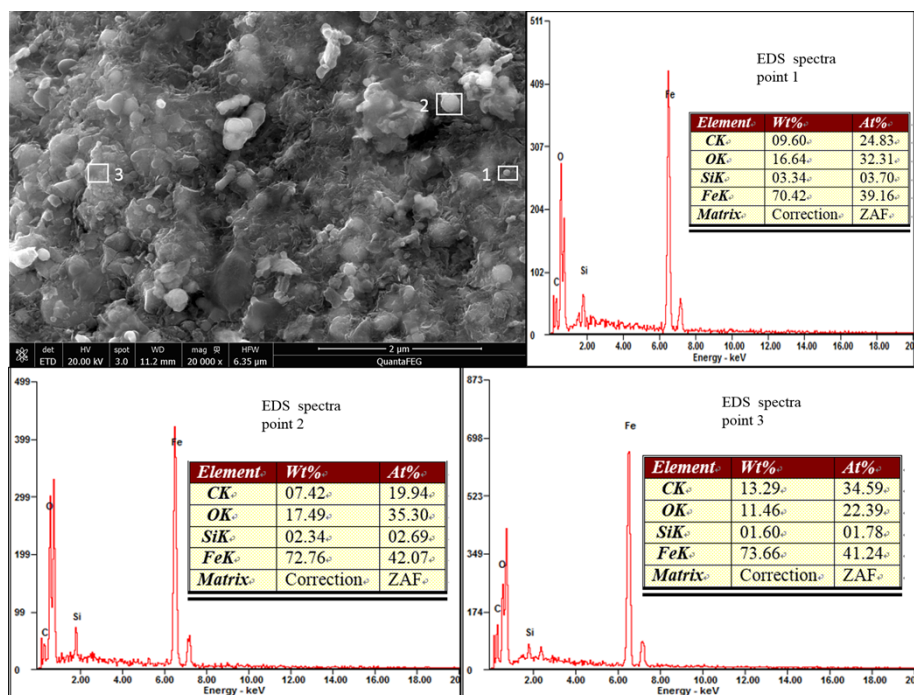

**Fig. S4.** SEM image and EDS spectra of (a) initial nZVI; (b) solids after 3-day dechlorination reaction; (c) after 14-d dechlorination.

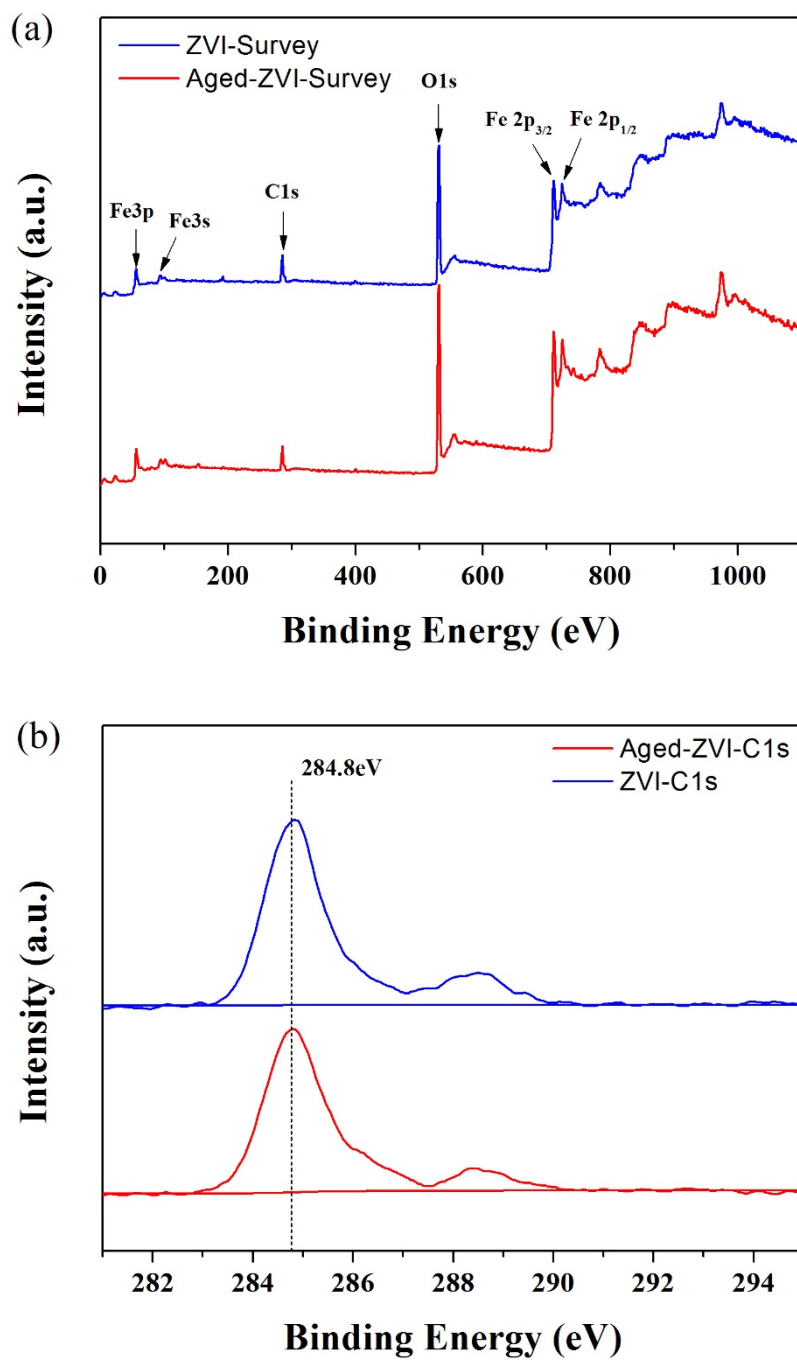

**Fig. S5.** (a) XPS Survey spectra; (b) High resolution C 1s XPS spectra.

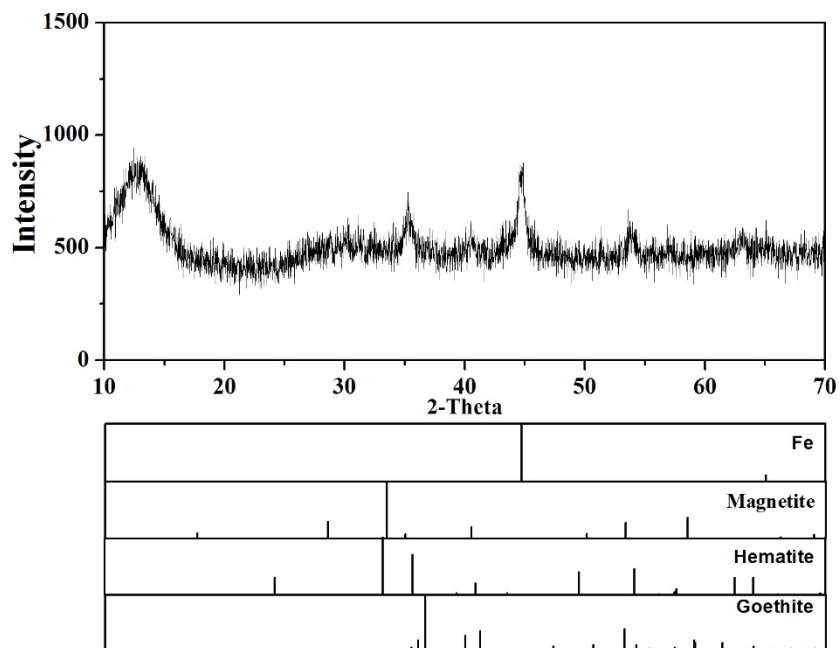

**Fig. S6.** XRD analysis of Aged-nZVI at the end of the experiment.

## References

1. C.-B. Wang and W.-X. Zhang, *Environ. Sci. Technol.*, 1997, **31**, 2154-2156.
2. K. Sohn, S. W. Kang, S. Ahn, M. Woo and S.-K. Yang, *Environ. Sci. Technol.*, 2006, **40**, 5514-5519.
